# Supplementary material
Source: HighWire-hosted journal article supplement (https://www.cmajopen.ca/highwire/filestream/81393/field_highwire_adjunct_files/0/2019-0105-1-at.pdf)
Supplement: 2019-0105-1-at.pdf [file 2019-0105-1-at.pdf]

## Appendix 1 (as supplied by the authors): List of questionnaire domains and measures of interest with sources of data

### List of questionnaire domains\*

|                             | Domains                                                                                                                                                                                                                                                                                                                                                                                                                                                                                         | Sources                                                     |
|-----------------------------|-------------------------------------------------------------------------------------------------------------------------------------------------------------------------------------------------------------------------------------------------------------------------------------------------------------------------------------------------------------------------------------------------------------------------------------------------------------------------------------------------|-------------------------------------------------------------|
| Sociodemographic            | Gender, age, residence history, birth location, job title, marital status, household status, siblings, language, education level, income, working status                                                                                                                                                                                                                                                                                                                                        | CPT DataSchema<br>ISIC Rev.3.1<br>ISCO-88                   |
| Life-style/behaviour        | Tobacco use, passive smoking exposure, alcohol intake, nutrition, sleep, UV exposure, physical activity                                                                                                                                                                                                                                                                                                                                                                                         | CTUMS (2007)<br>The Tomorrow Project<br>National Sun Survey |
| Personal history of disease | Endocrine, nutritional and metabolic diseases, diseases of the circulatory system, diseases of the respiratory system, allergies and food intolerances, neoplasms, diseases of the digestive system, diseases of the genitourinary system, diseases of the musculoskeletal system and connective tissue, autoimmune diseases, diseases of the skin and subcutaneous tissue, diseases of the eyes, diseases of the nervous system and mental and behavioural disorders, injuries, weight history | CaMos (2005)<br>CSHA (2001)<br>CLSA<br>CHMS (2006; 2007)    |
| Health-care utilization     | Major operations, screening tests                                                                                                                                                                                                                                                                                                                                                                                                                                                               |                                                             |
| Medication intake           | Prescribed medication, over-the-counter health products (including food supplements)                                                                                                                                                                                                                                                                                                                                                                                                            | CPT DataSchema                                              |

\* Full questionnaires are available on the CARTaGENE website at:

<https://www.cartagene.qc.ca/en/researchers/data-and-catalogs>

Abbreviations: ISIC = The International Standard Industrial Classification of All Economic Activities; ISCO = The International Standard Classification of Occupations; CTUMS = Canadian Tobacco Use Monitoring Survey; National Sun Survey; CaMos = Canadian Multicentre Osteoporosis Study; CSHA = Canadian Study on Health and Aging ; CLSA = Canadian Longitudinal Study on Aging; CHMS= Canadian Health Measures Survey

### List of physical measurements

| Measurement             | Device                        | Method                                     |
|-------------------------|-------------------------------|--------------------------------------------|
| Sitting/standing height | SECA 214 Portable Stadiometer | Measured as an average of two measurements |
| Waist/hip circumference | SECA 200 measuring tape       | Measured as an average of two measurements |

|                |                                                     |                    |                                                                                                                                  |
|----------------|-----------------------------------------------------|--------------------|----------------------------------------------------------------------------------------------------------------------------------|
| Weight         | Tanita TBF-300<br>composition analyzer              | Body               | Measured by impedance analysis                                                                                                   |
| Blood pressure | Colin (Omron),<br>Prodigy II Vital Signs<br>OM-2200 | Press-Mate Monitor | Measured with automated device<br>that uses the oscillometric method<br>for assessing blood pressure. Mean<br>of 3 measurements. |

### List of haematological and biochemical measures

| Blood                              | Serum                             |
|------------------------------------|-----------------------------------|
| <b>General blood count</b>         | <b>Lipid profile</b>              |
| <b>HbA1C</b> (glycated hemoglobin) | Cholesterol                       |
|                                    | HDL-cholesterol                   |
|                                    | Triglycerides                     |
|                                    | HDL-ratio (HDL/total Cholesterol) |
|                                    | LDL-Cholesterol                   |
|                                    | <b>Other</b>                      |
|                                    | Glucose                           |
